# Supplementary material for: Difference in sensitivity between SARS-CoV-2–specific T cell assays in patients with underlying conditions
Source: JCI journal article supplement (doi:10.1172/jci155499), 2021-12-14
Supplement: sd1 [file 1]

# Difference in sensitivity between SARS-CoV-2-specific T-cell assays in patients with underlying conditions

Rory D. de Vries<sup>1</sup>, Marieke van der Heiden<sup>2</sup>, Daryl Geers<sup>1</sup>, Celine Imhof<sup>3</sup>, Debbie van Baarle<sup>2,4</sup>#, RECOVAC-IR Collaborators\*

<sup>1</sup> Department Viroscience, Erasmus MC, Rotterdam, The Netherlands

<sup>2</sup> Department of Medical Microbiology and Infection Prevention, University Medical Center, Groningen, Groningen, The Netherlands

<sup>3</sup> Division of Nephrology, Department of Internal Medicine, University Medical Center, Groningen, Groningen, The Netherlands

<sup>4</sup> Center for Infectious Disease Control, National Institute for Public Health and the Environment, Bilthoven, The Netherlands

## # Correspondence

Debbie van Baarle, Department of Medical Microbiology and Infection Prevention, University Medical Center, Groningen, Groningen, The Netherlands. Email: d.van.baarle@umcg.nl

## Supplemental acknowledgements

\* RECOVAC-IR collaborators:

Marcia M.L. Kho<sup>1</sup>, Marlies E.J. Reinders<sup>1</sup>, Carla C. Baan<sup>1</sup>, Frederike J. Bemelman<sup>2</sup>, Dimitri A. Diavatopoulos<sup>3</sup>, Ron T. Gansevoort<sup>4</sup>, Robert S. van Binnendijk<sup>5</sup>, A. Lianne Messchendorp<sup>4</sup>, Renate G. van der Molen<sup>3</sup>, Ester B.M. Remmerswaal<sup>6</sup>, Nynke Rots<sup>5</sup>, Priya Vart<sup>4</sup>, Luuk B. Hilbrands<sup>9</sup>, Marion P.G. Koopmans<sup>10</sup>, Corine H. GeurtsvanKessel<sup>10</sup>, Jan-Stephan F. Sanders<sup>4</sup>

<sup>1</sup> Department of Internal Medicine, Erasmus MC, Rotterdam, The Netherlands

<sup>2</sup> Renal Transplant Unit, Amsterdam University Medical Center, Amsterdam, The Netherlands

<sup>3</sup> Department of Laboratory Medicine, Laboratory of Medical Immunology, Radboud University Nijmegen Medical Center, Nijmegen, The Netherlands

<sup>4</sup> Division of Nephrology, Department of Internal Medicine, University Medical Center Groningen, Groningen, The Netherlands

<sup>5</sup> Center for Infectious Diseases Control, National Institute for Public Health and the Environment, Bilthoven, The Netherlands

<sup>6</sup> Department of Experimental Immunology, Amsterdam University Medical Center, Amsterdam, The Netherlands

<sup>7</sup> Department of Health Evidence, Radboud University Medical Center, Nijmegen, the Netherlands

<sup>8</sup> Department of Cardiology, Radboud University Medical Center, Nijmegen, the Netherlands

<sup>9</sup> Department of Nephrology, Radboud University Medical Center, Nijmegen, the Netherlands

<sup>10</sup> Department Viroscience, Erasmus MC, Rotterdam, The Netherlands
